# Supplementary material
Source: Springer Nature journal article supplement (https://www.springermedizin.de/resource/supplementary/12879_2003_91_MOESM1_ESM.pdf/9448256)

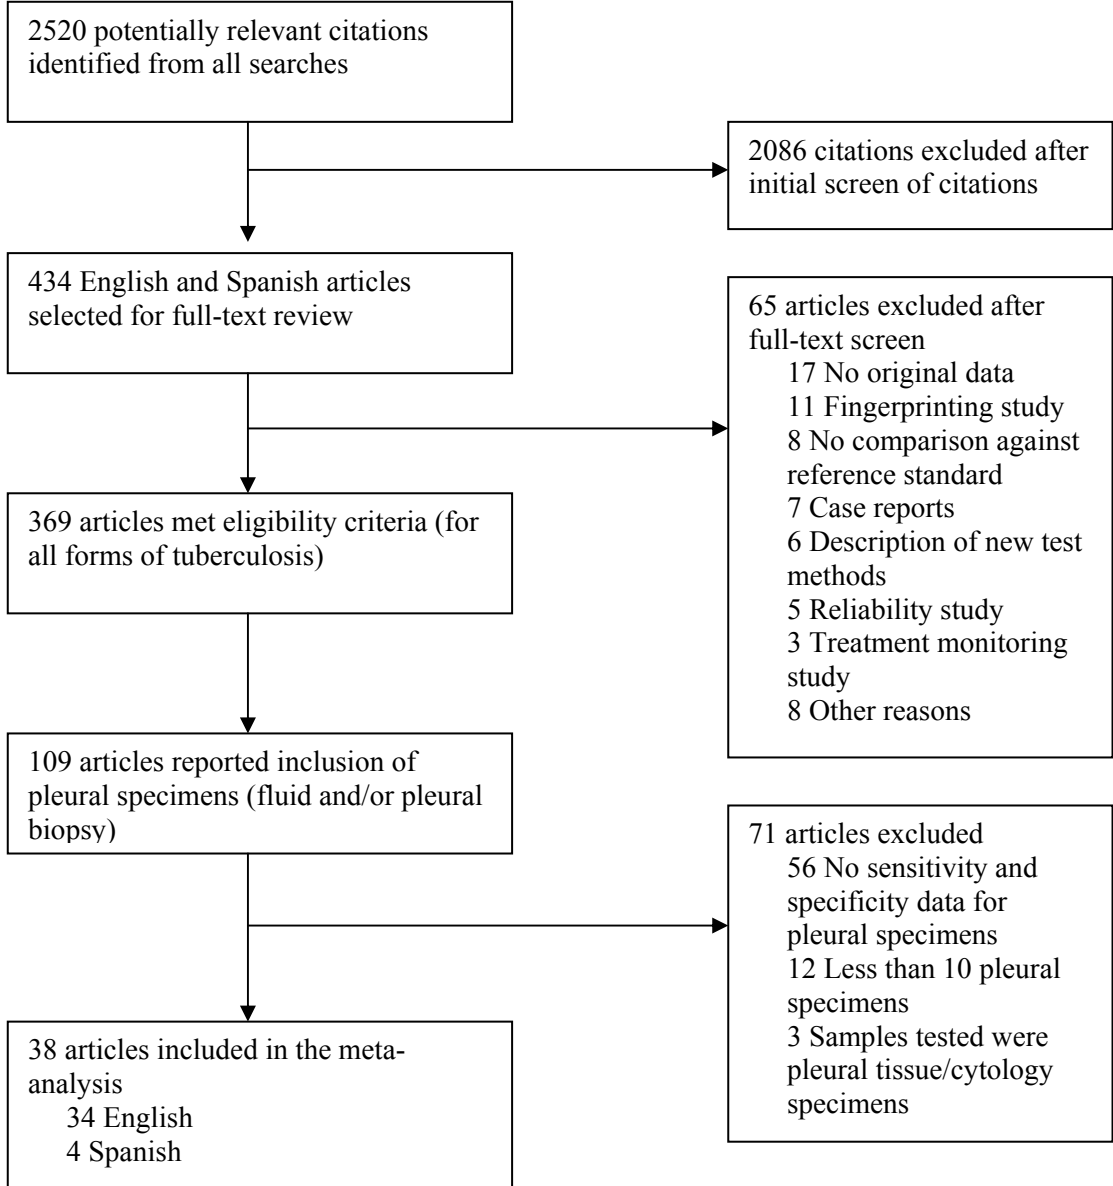

Supplement: MOESM1 [file 9448256]
